# Supplementary material for: Development and characterization of novel microsatellite markers by Next Generation Sequencing for the blue and red shrimp Aristeus antennatus
Source: PubMed Central journal article supplement (PMC4974933; doi:10.7717/peerj.2200), 2016-07-27
Supplement: peerj-04-2200-s001.pdf [file peerj-04-2200-s001.pdf]

GAGGGCAAGTCTGGTGCCAGCCGCCGCGGTAATCCAGCTCCATTAGCGTATATTAAGTTG  
TTGCGGTTAAAACGCTCGTAGTTGGCTCTCTGTTCTGGACTGGCGGTTACCTTAGCGGTGCT  
TACTGTACAGCTCCGAGCTATATCCCCGCCGCTCGCCTGGGGTGCTCTTACCGAGTGTCC  
TCGTGGCCGGCACGTTACTTTGAAAAAATTAGAGTGCTCAGAGCAGGCTATACTAACAGCC  
TGAATGGTGGTGCATGGAATAATGGAATAGGACCTCGGTTCTATTTTGGTGGTTTTTCGGAAC  
CCGAGGTAATGATTAAGAGAAGCAGACGGGGGCATTCGTAAGTGCAGATAGAGGTGAAAT  
TCTTAGACCGTTCGCATGACGAGCTACTGCGAAAGCATTGCAAGGATGTTTTTATTAATCA  
AGAACGAAAGTTAGAGGTTCAAGGCGATCAGATACCGCCCTAGTTCTAACATAAACGAT  
GCTGACTAGCGATCCGCCGAGTTATTCCCATGACCCGGCGGGGAGCTTCCGGGAAACCAA  
AGTATTTGAGTTCGGGGGAAGTATGGTTGCAAAGCTGAAACTTAAAGGAATTGACGGAAG  
GGCACCACCAGGAGTGGAGCCTGCGGCTCAATTTGACTCAACACGGGGAATCTTACCAGGC  
CCAGACTGGAAGGATTGACAGATTGAAAGCTCTTTCTCGATTCCGGTGGTGGTGGTGCAT  
GGCCGTTCTTAGTTGGTGGAGTGATTTGTCTGGTTAATTCCGATAACGAACGAGACTCTAGC  
CTATTAAGTCTGACGATCTTACACTCCGTTGTTTTATATATATAAATGAAATGGTGTCC  
AGCTCGCAGCTTCTTCTAGAGGGATAAGCGGCAGCAAAAAAATACTAGCCGCACGAGAG  
ATTGAGCCATAACAGGTCTGTGATGCCCTTAGATGTTCTGGGCCGCACGCGCGCTACAATGG  
AGAGTTCAGCAAGCTCTCCCTGCTCCGACAGGAGTGGGTAACTTATCAAAGCTGTCCTTAA  
AGGGGATTGGGGCTTGCAAATGTGTCCCATGAACGAGGAATTCCCAGTAGGCGCAATTCAC  
CAGATTGCACCGATTTAGTCCCTGCCCTTTGTACACACCGCCCGTCTACTACCGATTGAAT  
GGTCTAGTGAGGGCATCGGACTGGCGCTCTTGGAGTGGTCTCTCACCTCGCTATGAAATCCT  
CCTCGTGGGGACGAGAGGGGGGAGCCGCTCGGGTGCAGGAAAGATGTCCGAGCTGGGTC  
ATTTAGAGGAAGTAAAAGTCGTAACAAGGTTCCGTAGGTGAACCTGCGGAAGGATCATT  
CAGTATTATATGATTACACACAGAAATACATGATGATAAATAAAAGGGTCGCCAGGGGAC  
CTGCACATCATCGTCGTCATCCTCCCCCTCCTCTGTAGGACGACGACGACGACGACGTCGGA  
AGGCAGTCCCTGGCGCACACCACCCCAATTATTGACATAACCAATCATCAATCAATCGTGAC  
TTCGATGACAGCTCCAAGGCAGGCAGATAGAGACAGTTATGTGATTTGCAGACAGAAAA  
GCCATCCATCCATTCCCAAAGGAGGAGGTGATGATGCTTATGCTGCTGCTACTACTGT  
GCTACTACTACTCCTTCTCTGTCGTCGTCGTCGTTGATGATGATATCCTAGGAGGCT  
TTAGAGGCTGCCTCCTTTGCCGCGCTGTTGCCTGGCGCGGCAAGAACAACAGACTGCTCTCT  
CGCCTGCCTCTTGAGGCAGAACTCTCCTTTGAGGGTCTCCAGACTTCTTCTTCTCCTTAAATG  
GTTGTCTAGAAGAAAGAAGGAAGTCTTATTCCATATCAAACCTTTATTGGCTTCCCCGGA  
CACAAGCGGGGATGATCATGATTGTGACTTCTGTATAAACCCTTAAAGCACAAGTCTTAAACGG  
GGGATCACTTGGCTCGTGGGTCGAGGAAGACCGTGGTAAAAAGCGAGGTTTGTATGGCTATC  
GCAATTTTACGTACTCCATCGACACGTGCAACGCACATGGCGGGGCTGCCGTAAGGGCC  
TAGTACTACTAATATATAGGCTGGCGTCCGACCTTCACTCGAGAGTCTTCCGCCCCTT  
TGACAGACAATGGGTGTGGATTATTCTTTAAGAGTAAGATTATCGCCGTGACGCCGACA  
AGGCTCACCAAGGCCTCGTGCCTGCCGTTGCCCTGCAACGCCCTGGGGAGATCGCTGGCAAA  
ATAAGTTCGGAGCGTGCCAAAGACAAATTCCCGCCAGCGTTCCTTAAAACAAATCACATGC  
ACGTGCACCTCCGACGACACAAGTTCCCGGCCGAGGGGGGAGCGCACAGCACTGGCACTCA  
CTCAGAGAGAGAGACGGATAGAGTGAGTGCTTCTTGGGAGGCAACAGCCCCCAAAAAGAGC  
CCTGTGAGGCTGCGACGACGACTGGGACGACGACTGATGACGACGACGAAAGGACTTGCTC  
TCTTTTGCTGCCTGCCGTGGCGGGCAGCTCCCTTGTCTTCTCCCTTGCATCTCACTCTACA  
CTGCCCCGCTGGAGTGGGAGACGCAGTGAAGGGGGGAATGGAAGAGGGAGGCGTTTTTCGGCG  
TTTGCAAATGGATGCATGCTTCTCTTTGTCATTTGCAGTAGGAGTCATCATCACTGATCCAG  
TCAGTCAAAGCCTTGGCTTGTGTGCGTCACCTCTCCTCGTCGTTTTCTTGACCGAAATATGA  
AGGAAGGAAGGCAGACGGACCACCGACTGTACTGTACAGTTACAGACAGACCTAGACAAAG  
TGCTGGCACAGAGAGAGACACCAGACTGGTTTTGCTAGGAGCCTGGCTGGCTCGGGGGC  
CGGGAAGGAAGGAAGTAAGGAGGGAAATCTTGCTTACCCAGGCCATCCCCATGCCACGG  
CAGTGTCTGTCAGTCAGTCAGTGAGTCAAAGTCTTGACTTATTCCTCAGTCCGAGAAACGAG  
GGAGGAAGCGACATTATATGTCTTTGCTCTCTGTCCCTCGACGACGTTAAACTAATTTTTTT  
GTTAGTAACCCACCAACTATTTTTGAAGCGACCTCGAGTTGAGGGAGATCACCCGCCAAATT  
TAAGCATATTAATAAGCGGAGGAAAAGAAACCAACAGGGATTCCCTTAGTAAGGGCGACTG  
AAACGGGAGTAGCCAGCGCAAAGCCTCGTGCTTCTAACGGGGCACGAGGGGTGCTGCGT  
TTGGGAGAGGTCTTGCACGCGGTCCCAGCGCCGCTAAGTTGTACATGAATGACTCTAATGCC  
CAAGGAGGGTGTGAGGCCGTTGTGGCGGTAAGAACCCCGAAGGGGGGAAGGTACGGGA  
CTGCGGAAAGGGCCTCTCCTTAGAGTCGGGTTGCTGAAACCGCAACCTAAAGTAGGTGGTA  
AACTCCATCTAAGGCTAAATACGACACGAGACGATAGCGAACAAGTACCGTGAAGGAAA  
GTTGAAACAGAACCCTGATAGAGAGATTCAAGAGAACCTGAAACCGTTAAGAGGCTAAACG  
GGTGGAGATTGAAAGATCGAACTGGGGGGATTGAGTTCGTTCCGTTAGTCCGGGGGGTTTT  
CGGGACCACAACAGCGACCCCGAGCGTGCGGCTCTAACGTCGCAGTCCGCTCTAGGGGGC

GCGGCCCGTCCCCTGCCCGGCGCCGGCGGGCGATTTCCCCCCGCAGTAGGTCGCCGCGATG  
CGTTGGGAGGGCGTCTGAGGCCCGGGCTTTGGCAGGAACCGACGTCGTCGCTGTCGCTAAA  
GGCTGCCCCCGTGGTAGTCTGACAGAAGCGGGCTCTGGGGATCCCCCGGTGTAACATCATCGT  
TGCAATTAGTAGCGATGATCCTTGCTTGTCTCTCCCGACGGTCGCTCCTTGGGGCGGCGTCTGC  
TGCTGTTCGCAGCAGCGGCGCTCGCCTTCGCGGTGTGCAAAGAGTCGAGGCTCTACCCGAC  
CCGTCTTGAAACACGGACCAAGGAGTCCAACATGTATGCGAGTCATTGGGCTCACTAAACCC  
ACAGGCGCAATGAAAGTGAAAAGTGCTTTGCCTCGTGCATAGCTACAGGGCCGATCCCTCG  
GTCCGGACGACCTTTGCTCTCCCTGGACGGAGTGACAAAACAATGCCTTCCTCCCCGGGGA  
GCTACAGCTCTGTAGTACTCGGGCTAGGGGACTCGTCCGGTGCCGCAAGCCTCTCCTCCTGC  
CTCCGGTAGGGAAGGGGGGCGCAGGTCCGGGACTCGCCATGACGAACAGCTGTCTCTCT  
GGCTGGCTGCCTCAACAGTGGCTAGCTTGCAGGCTTCTGGATGTGTCTGGGAGTACCTAGA  
GCATAAATGTTGGTACCCGAAAGATAGTGAACATGCCTGGCCAGGATGAAGCCAGGGGAA  
ACCCTGGTGGAGGTCCGTAGCGATTCTGACGTGCAAATCGATCGTCAGAGCTGGGTATAGGG  
GCGAAAGACCAATCGAACTATCTAGTAGCTGGTTCCCTCCGAAGTTTCCCTCAGGATAGCTG  
GCACTCGTCAATAACGAGTTTCATCCGGTAAAGCGAATGATTAGGGGTGTTGGGGACGAAA  
TGCTCTCAGCCTATTCTCAAACCTTAAATGGGTGAGGTGCCGGGCTTGCTTTATGTGCCCTCA  
CGGGCCTTGAAGCCCCGGACACGAATCGGAGTGCTTAGTGGGCCAATTTTGGTAAGCAGAA  
CTGGCGCTGTGGGATGAACCAACGTCGAGTTAAGGGGCCTAAATGGATGCTAATTCCGAT  
ACCATGGAAGGGAGTTGCTTGTATAGACAGCAGGACGGTGGCCATGGAAGTTGGAATCCG  
CTAAGGAGTGTGTAACAACCTCACCTGCCGAAGCAAGTAACCCTGAAAATGGCATGGCGCTC  
AAGCATCCTCCCGATACTCGACCGCCGGGCGCACTATTGGCTGCAACAAGGAGGTCTCGAG  
GCCCCGGTGAGTAGGAGGAGCGCGGTGGTGAGCGTTGAAGGATTCGGCGTGAGCCGGTCTG  
GAGCCGCCACTGGTGC GGATCTTGGTGGTAGTAGCAAATATTCGAGCGAGACCACCCTCGTT  
GACCGACGCGGAGAAGGGTTCCACGCCAACATCGCTTGGTTCGTGGGTAGTCGTACCTAAGC  
CCGGGGATAGCATCCCGATTTACTAGGTGTGCTGGCTTTCCTGTCCCAAGTCATAATTATGCA  
CCACCCTGGTAATGAATGATATAGTCCTCCCTCGCGCCTCGCAAGAGTATTCCCCGCATCTCC  
CTCTCTTTTTTTCTCGAAAAGAAAGTAAGGGTGTTGAAGGAGAGTGCCTGCATTCTCCGTTG  
TTACCTTGCCTGGCGGAGGTGGACTGGCCCCGCCAGCCAGGCGGAGCTTTGAAAGAGCTT  
GATTTTATCCCTTGTCCAAATGTCATGCTCTAAGAAGACAGACAACAACACTACTGTAATAGGC  
AGACGGACAGACTTTCTTTCTTTTATTAGTCAGTTGGTCCGGTCCGGTCCGTCATTTCAGTTCGT  
TCGTTGCTGTTGCTATCCATAGCATCATAGCGATACGCTGCTGCTGCTACTAGTTTTGAGAAG  
AGAGAGAGAGATTGTCTCATAACACACAGCCAGCCAGCCGGCGATCGCTTGTCTGCTTCCCC  
AAACGGTCTGTTTAAAGTCCCAGATCAGTGGCGAAAGGGAATACGGTCAATATCCGTAACC  
TGGCCCGGTACCACCCGCCTCCCTTCCAGCTGCATATCCCATGACCCCTTATCCCAACAGCA  
ATTCATTATTCTGTTCTGTTTGTGTTGTAGTGTCTCCTCGAGGATAGGGGTCTAGAGAGTA  
GCCTGGGAGGCGGGTTAAAACCTTTAAAACAATAACAAGTTATTGTCGATGCCGAAGGCATG  
GGAGTTAGTCACTTCCCTGCCGCATCTAAGGACCGGTCTGGCGACCTGTGTGCTAGATGAT  
TATCCTCTTCCAAAAGAAGAACTGCTTTGATAGTACTTACTGCAGCTGCTTGGTAGCTACTA  
CTACGACGACTGCTATTGCTGCTGCTGCAGCTGATACTGCTATTTCCAAAGCAGCTTGTGTGC  
CCCCGTTCTCCTAAAGATGGCGTGTGTTTTTTTTGGGTGCCGTCCGAGACCGTGTGCCTGAAT  
GTTTGAAGACACGGCTCGGCGGCAGGCTCCCCCATTTTGTGGTTGGCACTAGTTCGACTGGC  
ACCCCGGTAACGGGAACCTGTTTCGCTGACGCCGGCGGTGGTCCGGGAAAGAGTTTTCTTCTC  
CCTTTTAGGCAGCCGGAGACCCCTTAAAGTTTTCACTTGGCGAGGGGGTCTGTTGGTAGTAAC  
AATATGATTGGAGAGGCAATGCATAATGCCCCGGTGTTCGCCGTAGAGCGCCACGCAATTA  
AGCGTAGGTGTCCCGTGCCTGCCCGGCCCTTAAAAGGCGATGCGGGTTACCACTCGAG  
CAAACCACTGCCACACCACTCAATGAAAAGAGCCCTTCAATGCCCTGACCATACTCTGGGG  
ACGGAGAGAGAGAAAGGCACACACACATACTGGCTGGTAGTATTATTATTAGCTGTAGC  
AAGCGAGAGAGAGAGCAGAGTAGTATGGTAGTAGCCGTAGTACTATGACAACAACGCAGTT  
TCTGTCTCCTTCTTTGGTTGATTGCTGTTGCTGGACGGACGCCACAGCGTCTGTCTTACA  
CTCTTCTGAAGTGATCTGGCTTAGTCGGCCGACCTCCCATCCTCCGGGCTTGGGTTGGTCTGTG  
CCTTCTTGAGTCTGTGTCCAAACTTTTAAAAGAAGCGGGACAGCCAGCCATCAGATGGAGT  
GTGAGAGAGAGAGATAGCGCAGCCGCTCACCAGAGGAGGCAGAGGAGACAGGAGGAAAGG  
ATCATAGAGGTCCCTTGGCATCGGGTCAGCACGTACCGAATCCGCAGCAGGTCTCCGAGGTG  
TGGAGCCTCTGGTGCATAGATTAATGTAGGTAAGGGAAGTCGGCAAGTTAGATCCGTAACCT  
CGGGAAAAGGATTGGCTCTGAGGGTCCGGTCCAGTCCGGCCTGCGCGGGAAGCGGCTCCTT  
CGTACGTGGGCATCCTTGGTGCCTGTCTAAAGGAGAAAACGGAAGTGGGCGAGGGGGCCGATC  
GTCGCTTAGGCTTCCATTCCTCCTCTGGCTTATGCATCTTCTCGTGTCTCTCGGCTGCTGC  
GGCGGTCCCGGTGCTTCTGGGGCGGGGGTCTGTTGTTGTGGTGGTGGTGGGCGGGGGA  
GCTCTTGTGTGTTCTAGGGGTCCAGGGGTGCGGGTTCGAGGTGGCGTGCCGACCCGAGCTC  
GGACCAATCTGTTACGGCAGCATAACGGGGCCCTATCCATTAGGACCGTGGAATGCGTTTG

GCAAAGGGTGGGCTTTGTTGTCCCGTCGCTAACACCTGTTGTGCGGCCGAAGGGGAATCAT  
CATGGCCTTTGGTTCGTCACCATAAGAGTTTTTCATTAAGCATTGCGGCCAATGGCATAAC  
ATGTCCCCCGAGGCTCATGCACTGGGGTGGATGGGACGACCCCAACCGCGGCTGGCGGCTA  
ACGGCCGTCTCAGAAGTGGCACGGACCAGGGGAATCCGACTGTTTAAATAAAACAAAGCAA  
TGCGATGGTCAGTGAGTGATGTTGACGCATTGTGATTTCTGCCAGTGCTCTGAATGTCAAA  
GTGAAGAGATTCAACCAAGCGCGGGTAAACGGCGGGAGTAACTATGACTCTCTAAGGTAG  
CCAAATGCCTCGTCATCTAATTAAGTGACGCGCATGAATGGATTAACGAGATTTCCACTGTCC  
CTATCTACTATCTAGCGAACCCACAGGCAGGGGAACGGGCCTGCAGTAAACAGCGGGGAAA  
GAAGACCCTGTTGAGCTTGACTCTAGTTTTGATTTTGTAGAGAGGCATCAGAGGTGTAGCATA  
AGTGGGAGGCTTCGGCCGACAGTCAAATACCACTACTCTGATCGTTTTCTACTTACTCGGTT  
ATACGGGACGGGAGCTTCCTCGCGAGGGGAATGCCTCCTGATTTTAGTTCAAAGCGGCAAT  
GGTCGTTTCGCGACCCGCGGACCCGTACCGAGGACAGAATCAGATGGGGAGTTTGACTGG  
GGCGGTACATCTGTCAAATGATAACGCAGATGTCCCAAGGTCAGCTCAGCTGGACAGAAA  
CCACGTGTAGAGCCTAAGGGCAAATGCTGGCTTGATCCTGATTTTCAGTACGAATACGGACT  
GCGAAAGCAAGGCCAGCGATCCTTTTGACTTTTACGAGTTTTAAGCAAGAGGTGTCAGAAA  
AGTTACCACAGGGATAACTGGCTTGTGGCGGCCAAGCGTTCATAGCGACGTGCTTTTTGAT  
CCTTCGATGTCGGCTCTTCTATCATTGTGACGCAGTTTTACCAAGCGTGGGATTGTTACC  
CTTTAATAGGGAACGTGAGCTGGGTTTACCGTCTGAGACAGGTTAGTTTTACCCTACTG  
TTTACTCGAAGCACGTTGCGACAGTAGCCCCGCCAGTACGAGAGGAACGGTGGGTCCGGA  
CCAATGGTCAACCTCTTGGCCGAGCGCCAGTGGAGCGCAGCTACGTCCGGAGGGTTTACC  
CTGAAAGCCTCTCAAGGGTGAACCCATACTGAGCGTTAGCAACTTGACGTCTGCGACCCAA  
CGGATCGGCGAAAAAGTTTTTACGCGTGCCCCCTTTCCTTCGGGTTCGGGGGTGGCGGACTC  
TGCCCATGCAAGGGGAACCTCGGGGGCGGCATAAGAAAACGAGGCCGCTTCCCTTCCCGAA  
TACAGAGCCATCCAGATCCGGAGTGTCTACCGAACCGTCTGCATACGACTTACGTATCGGC  
CGGGGTGTCGTGATACCTAGAGCAGGGTAACTCCTGCGATTGGTTAAGACTCGTCCCCATTA  
AGGTCCGAAGTTTTGTCTGTCCCAGAGACGGACACTAGGAGGTTACGCCCTTCTCTTCT  
TCTTAAGAATTAAGAAGAAGGGAAAAAACAAAAACAAAAACATAAAGGAGAAGAAGGC  
CCAGCGATCCTTTTACTTAACAGAGATCTCTGAGAGACAGAGGAAAAAGAAGTTGGAAGAA  
AAACCCAAAAAACAAAAATTACCTGGTTTTATCATAATAACCTTCTTCTAATAAGAGAGAAT  
GAATAAACAGGCGATGGGCATAATAAGCACCAACGTCTCTTTTGGAGCCAGGGGAGCAGC  
AGCAGCTGCCTCTTTTGCCTCTGCCAGTCTAGTACTAAAAGTAAGTAGTACTGGTTGAGC  
TTTCATTTTGTATAGAGAGAGGCATCAGAGG

>*Aristeus antennatus* voucher LIGUDG Aa872; contig00060; microsatellite Aa60 sequence

AAGTACGGGGTAGAAAAGAAACGTATGATGAGCACTAACAAAGAATCGTCTGCAGTGATGGA  
TCAGCAGGCTAGACCACGACGGTGGCGTTTTGCCTTGCGATTTTTACCCTCTAGAACCAATT  
AACCATTTTCCATTGGTTTTAATAGTAATACTTTTGCGAAAATTAATTTACAAGCTTTTTTA  
GGAACCTATTACACGCGAAAGTACAGGTCCCACCGtatatatataacacagtatatagatatatgatataat  
tatatacagtatacagtatgatataatgttttaaatatgatataatataCAGTACATATCCTTTTATCCGAAAT  
TCTGGAACCCGAAAAGCTCCGAAAACCGAACATTTTTGCACAAGAATATTTTGTATTTTTT  
GGTGAACACATGTAAACAACCTCCACCCCTGGCTCAGACTTTTCTCCTATTTTTCCCAAACT  
GACTTTTAAAGGCAAGTTACATACAGTGTGTTTCATCTCAGCTGTTGAGCTCTTGTCTATAAG  
CTCTCTAATAACGCCTATTGTCATGTGTTTATATCTTTAAATTGTTATATATTTAGTTCCAAAA  
GCCATTTAACGAGAAAAGTGGCCACCCACTTGTTAACGATATTTTATGGGGAAGCGAAA  
ACTCTTCTCTGTCTCTACAAAATAATAACAATCACCTAGACAAAGAGTAGAATAACTAC  
AAGACCCACAGACCCATCGAAAGAACTGAATAATTTTACCTTCGACATCCAGATCGGCTT  
GCGGAATACCTGAATAATAGTAGTTTTGTTTCATTGTCTCTTTCTCCCTCTCTCTTATGCGA  
CTTTTCAACAGTATACTAATGCTTCTTTAGACTGTAATTAACCTTATTATGCATAAATAAA  
CAATACAAAATGAATACGTATCTAAAAAATTACATTAACATGGAATGTGTCAGTGAGGGG  
GAACTTTTTATGATGCAAACGGAATTGAGTCTTGGAGCGCTATGACATACGGTTCACTAAC  
TTCATTTGGAGAACATCAAGCCTCTGTTGAAGGTTATTCGATAAGAAATTACTTCGATATA  
GTTATAATAACGTTCAAAAATATTTAAAAATCCTCTGCAAGAAGTATTATTGAATAGATGTAA  
TGATATACACGAGAGTGAAGTTTACGACGGGAAACAAACGCGCGCGCTTACACCGATCG  
CGAACGCTACGTGTCCAGCTGGCATGAAAGGGAATCATTTCGTATGAACGTCTATTTCTTCAT  
TTATAATGTTTATTTGATAAGAAATTACTTCTATATTGTTACAATAATGTTCAAAAATACTGTT  
CAGTACATCTGAAACCCCTCTGCTAGAAGTATTAGTGAAAAGAAGTAATAATATATATGAGA  
GTG

>*Aristeus antennatus* voucher LIGUDG Aa872; contig00123; microsatellite Aa123 sequence

CAGGCACTTGCACTCTCTGTTCCAGAACAGTGCCGTGTACATCTCTGAAGTGTGTTAGGACGTCTGTCTCGTGAGCGACGCAGGGTATACTACGAACCTTGTCTTAACAACATTTCCATTGATGTCCAGTAAGTGTGTTGTTGCAAAAGTGATTTTGTGTGAGATTGGCGATAGATATATGTA AATTGCATTGTTTAAGGCGTAAATGTTTGTGTTTATGTA CTGATATATACATGCGTTGGGAACGATAAGGAGAAATGGATATAGAGATATAAATATGTTTATGTTGATGTATTTTAGGATTTCAAGGGATTTGCGGCTTTATATATTAATATCAATATGTCGGAACCTCTACCTAAGTCTTTGCAAAGACAACGTAAATGTCTCTACCTATTTGGGAGGGCTAGATGTCCATGCTTTGCCTGAGGAAAAAACTGCA GTCTTGTA AATGCGCTTTTAGTGA AAGTGTCTAAGAATCGAACTATTTGAACTATATATTTATATACCATTTGCGTAGGCatatatatatatatatatGAGTATCTATGTATATCTAGGAATATGTGTAGGTTTATATATATTAATTTTGT TTTATCTGTCTATCTTGATGTATGTTGGTTAGTTAGTTAGGTTAGT CAGAATCATGGAGCAAACCACCACACAGGCCATGTGGGGCCCGTGA ACTCTTTTGTATCTATGTATCTAGGTTATCTAGTTATCTGCAGTGGTACAGCTTTGGCCAGAATAGTTAAAATAAGGCTTGTTGGAGTTGATGAGATTCAAACGGGATTCCCAAGGCAATAAATGATTGTGAACGGAAGAAATGGTTAACTAAAATGCTTAACTCGGTGAAGACAATTCACCTGATGATTCCA AAAAATATCAATATTTATGCTACTAGCCTAAAAGTTTGGACAATCACTTTGAGAAGTCATGAGTGTTCGATTTTGT TAACTGCAGTTATAGATATAATGTAAAGTATAGTAGAAAAGCGA GTTGTGCAATGTTTCAGACCGGTTTTTAAAAAGGTAGAGGAAGGTAGGAGGGAGATTATTATTGTTGTGCTCAAGAATTCTAATTAGAAGTGCAG

>*Aristeus antennatus* voucher LIGUDG Aa872; contig00125; microsatellite Aa125 sequence

CATGTATGACGTCATAAAACTTCCGGACTTCAATCACACTACCTGTTACTTAAGGTGACTCAT TATTCCTTAAAAATAGCGAAAATCTTTGCAACGAGAAGGATCAACATGCCCCTCCAGACTC GCTCGCACATAAAAGTACCATAAAGAACATCAATGTtatatatatatataATGGTTTAATAATTATGATAAAGACCCACGAGCGCATACCGCCATTTAGATGGGCGCAAATTTGTCAACTTTCATTGTCCTCATTAAGCACAAATTTGCCATCTAAAATTAGTTTTCTATAAATCATATTACAGAGAAAAGGTTCAAGTTTGACCTTGCA CACCCAGATTTTAATACCGAGTGTAAATACCGGCTGGTGGAGA GGTGGAAAAGCCACTCTGAGGAATTTCTCCAAAATGGCTCGCAATGATTACGTTTTATATA ATTGTAGATATACACATGCATTCATTTTCATGTAATAGAGGGTTTGTATAAGACACAAGGCCTTACACTCATATATAAATGTGTTAGCTAAACTTTCACTTATATTATAGTAGCTGTTTGAATTGAAAATTGATGCCCAATTCAAATGGGCATCATGGAGCCTGTGGGGAAAGGTGACCACCAGA GATGAGTTTTTCAGACAAGGCAGAATTAGCATTTAGTGATACTTTGTGGTACATACTCATGTTTATGATACCTTGAGTCGAGTTCTGCAAATTTAAGGGTTAACACTAATCATGAAGTATATTGTTTATAGATTTTTTAAATTTAATTTTGTCTTTCTTTGTTAGGTTTCTGAAGAATGTTGAGGAAAGCA GTTGACTATTTGTTTTTCACTGAAAAGGAAGGTGCCACAGTTAGCGACATCACTATA GCCTCCTGATGATGGGGCTGAGTCGGATGCTGATGACCCAAGTGAAGGCTATTGTTGATGTTGGGAAGAAAATGTGAATCTACCGGGAGCCAGACTTTTAGAAAACCCTATGTATGTAGGTCTATTTTTCCGTTTTCTTCTTTGTTGGTCTGAGTTTCATCCTTCAGTTTGGCTTAGGTGTAGTATGCTGTGGCTCTTCAGGAATAATTACAGGCATAG

>*Aristeus antennatus* voucher LIGUDG Aa872; contig; microsatellite Aa127 sequence

ACACACACGTCCATCATCAGGAGTTATCTGAATCAGGAAAAAAGAAGTATAAACAGGACCGAGTAATGAGTTTTCGATACTAAAACAGTTACATTTTAAAACGAACTAAAAAGGTCCGGATCAAGTAAA AACTATTATCGTACAAGAATGTAAAAAAGTTAAACAATCATGCAAAGTTAAATGTAAAGGAGTATACAGATTAAGGAGACCGTCGGGTTTTGGGGTATCGGGAGCGGTATATGGTCTCGCATAATTGAGCATAAAAAGAAA ACTATATGAGATATCGAGATGATTTTTTTGCATATGGAAGAGCATGAAATTGCGCTTATTTGACTTATGTTTTATTGAACAGA ACTATACGGGGGCTTAGCCAGCTCCCCGAAAGTCAAATGTTGAGATTTTGTGAAAATGAAAAGAAAGGTTTGCCTGTATGACCCCGCTCATAACCGCTCATCAAAAATACATGGGACAAATATCATGAATAGTTGAATCGTATACCTCGAATGTGTGCTAGGAGAAATTTTTGAAATTTTGCTTTACTTTTTGTGTA AATCAGTTTTAAAAAGGGGCATTTTTTGGGTAAAAAGTGAGATTTTGA AAGGAATAACTCTATTTTTTCGAAATATAAAAATATCTCTACGACACATTTGAGCCATTTTATAGTACTTTCCAA CAAAACAATCAGATTTCAAATCGGACAAGCCGTTTTGACGGTGGATCAGACAGAAGACGAAA AAAAACGAAACCGAGAAAATGAAGTTTGTATTTGTGTC AATTTTCATTGCTAATTTTTTTTCATTTATATTGTATACTATATAATTGAAATGTATATAAAAAAACGGGCAAATTATATACTTTG AATGCAATTTATTACAATACTCAATAAGCAATATTTTTCTTATTATGATTTTTTCGAAAAACA CTTGGTTGGCAATGCAGACTTTTTTCTTGATTTTCTTGAATAAAAATAGCGCCCTATGCAAAACA ATGCTACTAAACAGCAACAGAAAacacacacacacatacatatcacacacGCGAGAGTTGCGCACACACA CACACACACACACA

>*Aristeus antennatus* voucher LIGUDG Aa872; contig00138; microsatellite Aa138 sequence

CCTACAAAACCAGCCTAAAACCATTGATTACTGCTCAAAAGAGAGTTATACGCACGATAGCT  
GGATTGAAAAAGTACGACCACACGCATCAAAGCTTTAATAATCTAAAACACTCAATCTTAA  
TTATATCAACATCCATTGCTGTGTATTATTTGTCTACAAATCAATAAATCTATATGAAAATAG  
TTTCTTTAGCTTTAGATATAATCAAAGGTATCAGCTGAGATACAGTAACCTGTTAAAACCTGC  
CATTTATAGGGTCCACTCAGGACGCAATCATGTATACTATAACCATGGAGCAAAAATCTGGAA  
CAATCTTCTAACAGCGTTAGGAATAAATCAACAATAGGTTCTTTCAAACATGCACTTAAAG  
AACATCTATGCTCCTCATTGAACTAATCAACCAAAAAGCAATCGCAAAAATGCACTTCGCCATC  
TACTCTACTTCTCTATGTTTCATGTTACCTCATATTGTTGCATTATAAATATTACTAATTTGTG  
TTCCGACTCTATCTAATGTTACCATATACTGGTCAACTGCCACATGTTTCTGTACATTGATT  
TTATTTTTCTATTACCACATATAATGTTAATTTACTATTTAACTGTCTTATTACCGCCATTT  
GTTCTCGATCACTACATGTTAGTTCTGCCTCGACCTAAGCCTTATTTCTTCTCTGTTTAAATGT  
TGCATTATCTGTTACATATTTTTATTTTGTGTTATTTAACCATAATTACATGTTCAATCTGTAAAC  
ATAAGAATTAAGGTGCCTTCTCAAGAGAGCACCAGCTCTCAGAAGGCTCAGCCATATCATAA  
TATGTAAGTACTGACTGTACTTGTATATAACAGCTTTGTAATACCTTTGGCTAAATAAACTTTATCA  
ATATCAATATCAATATCAATATCAATACCACACCACACCACACCACACCagagagagatagagagat  
agaaaagagcagagagagagagagaTCGAGGTTGCCACACTCAGAAACAAACGCTATAACGTCTGGT  
TCAACAGCGAGAGAATGCGGCCATGTCAGTGATATGGCGGCACCGACGTG

>*Aristeus antennatus* voucher LIGUDG Aa872; contig00173; microsatellite Aa173 sequence

GGGGACCTCGATGGAATTATATATGTGAGGGGCCCTAAGAGAATTTTCCATGGTCTCTGGC  
CTCCGATAAAAGGTCCCAATGGAATTATATATATATGAGGGGCCCTAAGCGAATTTGCGA  
AGTGGCCCAACCGTAAGGGGGGCCCCAAAGCTCTAGCAACGTCCCTGAGTAGAGTGGAAC  
AAATTCTTACAAACTTACACAACACACCTAAAAGAAGAGGATATTA AAAA ACTGTTCAAAC  
CAAGATACAATGGTAATATTAGAGGAATTTATTTTACGCCAAAAAATAATTA AAAA CAAGAA  
TAAGATAAGATAAAAAACAAGTTAAATCATTGCCTGCGTTTAAAACTCTTTAGACAGGTAC  
TGAAAAGCATtttgtttgtttgtttgTTGGGGCTTTAGACCTATCAACTGCCATGGTCATTAAGGTC  
AAAACACGGTCAACTCACGCACAACCGACAGACCGATCTCCTCTCACGGGAGATCAAAAAGT  
CCGTCTCAAACATAATTATGGTCTCACACCATAACTAGCCCATGAAAAAATAGCTGAGTGTT  
CCACCGTCGGTATAAGGTTCGGCCAGAACGTACCGCAGGCGACCACGCATCAGAAGGATCA  
CTTACCCGAGTCAGCCAAGCATCGCTTTTGGTTACTCCCAGTTACCATTCCGGAGCTAAAAAT  
CCATCATCCATGGTTTCGAATTCATCATCTCCAGGCCACGACGACGTGTCTATAGGGTTCATC  
AAGGACTGCGCACCGGAAATAGCCTCATTTCTTGAGTTTATCATTAAACAGATGATTTAAAAC  
CGAACTTTCCCCGCCACCTTCAAGTCGCTCACGCGGCGCCGCCCCATAATAAGGGCGACGA  
GTCCCCGCTGACAACCTACCGGCCATCATCAATCCTCCACAGTTTAAAGCAGGATATTTGAGA  
AGAGCGGTGGTGGGTAATAGGTTGA

>*Aristeus antennatus* voucher LIGUDG Aa872; contig00243; microsatellite Aa243 sequence

ACCAACACTATTCACCTACTATACCGCCACCTACCACCTTCAACAGCACACACCAACTACA  
TCTCATAATATCATATCTACACAACATCACACAAATCATCTCACACCCTTCCAAGTCAAAGC  
ACATCATGAAGCTCGCCACTGAGAGAGCAATCTCACACATCAGAACATACGAACACGACTG  
GAAGATACAGACAAACAGACATAAATCAACATAATAAACGTGGCCCCACAGCCTCCCACC  
TGCCCCACTCTACACATGGCTACGACGACCCCTGGCCCCCGACCTGGACCACTCTAAatacata  
catacatacatTCTTTAGTTTGTGTTGGGACTTTACACCTACCAACTGCCAAGGTCATGAAGGT  
CAACACTCACAACCTCAAGAACAACCAACAACCGATCTCCTCTCACGGGAGACCAAAAAGTC  
TATCTAAAAAGTATTTATGCTCTCACACCATAAATATGCCCATGTATATAGTGATATGTACGG  
TATTTATTTATAGCTACACTGTACCTCCCACACCATTTCAACCCATCTCTACCAAAAACCTCCTC  
ATCCCTTCCGCCACCCCCCTTAGCCGCACCTGACATCCAAAATCAAAAATCAAAACAAACAACC  
AACGGCTTCCCGCCACCCCCACCCCAACGAATTATCTACGGTGACCCTTATCAAAGCCGTAA  
ATCATGCCTCCACCCCTCTTCTCTTATCTCTCCTCTCACCTCTCACCTCCCACCCCCGTAC  
CAGCGACCTAAGGCGAACCTGAACATGTATATATCTATATTTTTTTTTTCTTACATCTCTCCCT  
ATGCATTTGTCTATATGTGTATATAAA

>*Aristeus antennatus* voucher LIGUDG Aa872; contig00268; microsatellite Aa268 sequence



CTTTCTTCATAGCCGTCCGCCGTCCGCCGTCCGATGCTCCAATGCCAGTTACGCACGGCACA  
TCCTTCCTCTATCACCACCGCCGACGTCACAGTACAACACACCCACAACAACCTCCACAAAA  
TACACCACCCAATACTAAAACAGACCTACACCCCGTAAATaacaacaacaacaacAAACTTAAAAAT  
CACACAAAATTA AACATCTCCTCAATACAAAAAATACAAAAAACA AAAAAACAATTAC  
AACACAAAAGAGAAACACCATTATCAATAACAAACCTTACAAAAATGACACTACCCAAGA  
TCTCAGGCTCCCTCAAATAT

>*Aristeus antennatus* voucher LIGUDG Aa872; contig00510; microsatellite Aa510 sequence

ATGCGTATATCAGTAATGTAATTAAGTGAAGTATACTGTATATGTTATCATTAAATATTATTAG  
TTAATTAATAATCAAATTGTTTTTTTTTACAAGGTGGTAGCGAAACCTTTGGAGGGTTAGGT  
GGAGTAGGCTTCTGATTAAAGGTAAAAACATTATACATATATAGAGGTGCCCTTACATTAG  
GGCTtcatcatcatcaTAAACATTCCGGCTCTCTGTGTTGTGTGTATAGTGGTTCTGGTGGATCCC  
CAAGTGCTCTGTGGAGGCTACGAGGCCACCAGTAGTGATCTCCAGTGATCTCCTTCTCCCTC  
CTGAATGTTAGTGTAGCTGACATCCTCGGCGCCTCCAGCCTCCCCATGTTGTTGTGCAGG  
TGTGTGATTCTAGTATTAGTGGCTCGAGCTTGTATCGTGCCTGTTGTCTCGTGTGTTGGC  
TGTGTTGGGGTATTGTTGTCGGAAATCCATTTTAGTGCTTTGTTTCGTATGGCTTGTAGTTTG  
TGTGTTTGTGTTTGGTATTATGTGTAGTGGTGTGTTGGTGGGTATTCCATGATGAGACTGATT  
AGTGTTTTACATAGCAGGA

>*Aristeus antennatus* voucher LIGUDG Aa872; contig00590; microsatellite Aa590 sequence

AGCGCATTAAATTAATTACTCAGTTGATTCCCTCCCTTACATCCTCACCCGGCACCGAGGGGCAT  
CTCGGCACGAGGCTTGGAGTGGAAGAGATTTCGTCAACTGATTCCCTCCCTGACACCCTGTTT  
AACCTAACTGAACCTAATCTAACCAACCCCAATTTAACCGACCcfaatctaatcaaacctaatctaatgcaaccta  
atctaacctaacctaatctaacctaacctaatctaaCCGACTTATTGATCGAACAGATTTCTAAAGTATTAGTATAG  
GCTACTGTACGATCTAGTCTCTATTACAAATTTGCACGGTATAACAGTTCCTACTTCCAGG  
TACTAGAACATAGCCGATGGTTACTATATTAGTTTTTTAATTGCAAGAATCACATCTCCGATC  
ACTACTAACTAACTTCTCTTTTTTTCTTTTTTTTTTTTTTTAATAATGCCAGCAAGGCACGG  
GCGAAGATCGCCCAAATCAAGGCTATGCTGGAGAAAAAAGGATAGAATCAGTCAAC  
ACTTCTC

>*Aristeus antennatus* voucher LIGUDG Aa872; contig00667; microsatellite Aa667 sequence

GGTCTTCAAGCGACCGGGTTCGATCCTGCCACGGGCCAAGGTTAAGAAGAGCAGACTCGG  
GGTAAGGGTCTCCCAATGCCAAAACCAAAAAAGGGTGGGGGGCGCCGTGGTATGGTGGTA  
ACGTGCGCAACTGAGAGCCACAGTCAGTTGAGTAATGGAGACGGCTCATCTTCTATAAAACA  
GCGATCCTATATAGTAAATGGGAATAAATGCTGCTGAGGaaagaagaagaaGATTAGGTGA  
GGTTATTCGGCTTGGAAATATGAGAAATCTGAAGAAAAAGTCACGGTTTTAATGTTTCTCT  
CACGGTGGTAGCGACCAACACGTGGGTGACTCAGCATATCGGGAACAATCAATCCAGAGT  
CGTGCTGAACCACTCGAGGAGTGTGAAGAAAGAGCTGTTTGTAGTGGTAGAATAAGGACATG  
TTGACTGGACCATACGATGGGAATGATGAGATGGAGAGGGGGGAGGGGGGGTCTGGTATGG  
AAT

>*Aristeus antennatus* voucher LIGUDG Aa872; contig00681; microsatellite Aa681 sequence

CGTTAACATCAAGTTTCTCGTCAAATTGAAGAAATCCGCGACGGAAACTTTTCAGTTATTGA  
CTGAGGCTTACCTATAAAATTGCGAAACTTCCGACACGAACAGAGTCATATTACTTTTTACT  
ATATGcacacacatacacatacacacacacacatacacacgcacataCTCTGATGGCAGAGTGGGTTACATCGGC  
CAGATCGTAGATCAGCAGTATTATAGTGAAGTCTTGTCTGTAGAGTTTTTACCAACCAAAA  
GGACACTGTGCTTGGAGCACACACCTTATTCGCCAGACCTTCCCTGCGTCTTTTACCTCTTCCC  
AAAGATCAAATCCATGCTCAAAGGAAACAGTTTTTTATCGGTAGAAGTTGTGAAAGCAAAC  
ACGACGCAGCTTCTCATCAGCCTTACAGAACATGATAACAAAGTTACAGTCTGTCTCGTTTTT  
TCTTTTGCTGTTGTATATAGGTGTGTGTGTGTGATCTTAGCTAAAAC

>*Aristeus antennatus* voucher LIGUDG Aa872; contig00691; microsatellite Aa691 sequence

GTAAGGGCAAAAAAGAAATCATATATATCATATTATGATACGATTTCAATTATCTGTGTTA  
CCATGGTTACCCTGTCAAACAACCGCTATTACACAACCTGATTTCCAACACGTCGCAGCCTG  
CTCCCTTATCAGGCACTAAGTCCAACATGTTTCGATCATGAATCTCTCTACCCCTATGCTATA



TTTTTTGGATCTAAGGGTGTGATTATCGACAACCTATTTTTTTCCAAATTTGAAATTTAAACCT  
CCAAACTGATCATAAGTGATGTTATTTTGTTCATTAGTGAGCATACAATTTGTAATTAGAATA  
ATATAGACATTCCTTTCTTTGAATCGGACGCAATGATGACGGGTAGGTTGCCAGAGCACGA  
TAATCACACCCAGATCCGAAAAAATAATGTATAGctctctctctctctctCATCCTCTCACGAAGATA  
TCCGCATACTATCTCCATCCGTGCAAGAGAATGCGGATGTGCGAAA

>*Aristeus antennatus* voucher LIGUDG Aa872; contig00751; microsatellite Aa751 sequence

GATCCGCGACGGAATGGAGACGTGAGATAGTGTGAATCGACCGGAATCTTTTAGACTCCaatta  
aattaaattaaattaaATTGATTCTATAACAATGTTGCTTACTCAAAGTACATTTGAAAAAGGTCATTT  
GTATTTACTAACAGAAAAAGGTCATTTGTATTTACTAACATTTCTGTGTTATCCTAATCAGAA  
ATTAGATCTATATCATGAAAAATAAGAAAAATCAAAATAGTAATTGGTCATCACTTTTGTGCGG  
TAGGTAAACTTTATCAAGCGCCAGTTGACACTTCCCTTACTTGAGAGAATGTGGTTATAATG  
TTATAAACTTTTAATGCATAGCTAACGACTACTAAGATATGGTAGGTTAACAATTATGATCC  
CTTCTTCCACTAGGTTAAGTGGACCGTCCCGCAAAATATGCAGGAAAATCACTATAAACGCA  
ATAAAACAGATCCGGTCTTACA

>*Aristeus antennatus* voucher LIGUDG Aa872; contig00785; microsatellite Aa785 sequence

AGTTGCCTTATATTTTTCCCTGGCTTGCACAGTCATTTTAGTAAGATTAACCTTGGTTTTAATT  
AAGATTGTAGAGGCTCCTCATACTTATTTGGAATATAGCTATATGGCAAGAGGAACATAATA  
ATATAAATTACGTGAGAAATAACCAAGAAATAATGAGGATCTCGTCTCCTGAAACATTACCG  
TGTTGTTATTTTACGCTGTTTACGCTGTTGTTTATAAACTTTGTAATAACATCTATTTTCATGTGT  
TTATCTCTTTAACCCTTCCATGAGTCTTTTTTTTTCGATGGTGCTGGGAGGCGCAAGAAATAA  
AAaagaaaagaagaagaagaaaTCATAGCATGCATTGCACAATGAAAGAAAACCAAGTTAAACTCT  
CAGAGCTCGCCGAATAAGGAAGTCACAGGCCGCGAAACAATATTTACATAGACTGGCTGCC  
TGGTGCCTATGTGTC

>*Aristeus antennatus* voucher LIGUDG Aa872; contig00818; microsatellite Aa818 sequence

GCAACCTCCGTACCCGACCTCACTCGCAGGTAAGTACTAGCTCGTTACCACGTAACAACCATCCT  
ACAACCTCCTCCTAATGCCACCCTTGGGATCACTGAACAGGAATGATGAATGCACGCGTCCAG  
TCCGAATAACACACaattcaattcaattcaattcaattCTTTATTTATTAAGTGTACGATACATCTTTATGA  
AAAATAAAATACAATATTTAAAACATCGAGTAAGGTTATGTACCCAGTCCATTAGACTTAC  
CCAGACTATACATAGTGAACATTTACATATACCACATATACAGTATTATAATATAATT  
AAAGCACCAAATAAAACAATTGCAATATAATATTAACAGAACAAAACGCATTTTACGTA  
TGTTACAGTGAATATAGAACATAGTACGACATATATTGATAATAGGAAGAGGTATGATATAT  
T

>*Aristeus antennatus* voucher LIGUDG Aa872; contig00867; microsatellite Aa867 sequence

TATTTTAAACACAAGAGAGTAGGCATTCTGCTTTTACATGAAAATAAGAGCCAATGGTGTGGT  
TTGTGAAAATAAACTTTAAAATAATCTGGGGGTAGGCCTAATGTTCTTGTAAATAAGTTAGTT  
CATCACACTGTCGTCACCTGTCAGGGGATAAATAAACTGAGTTTATCTATTTTTTAAACAACC  
ATTAATTCCTATTTAAGGCTTTTCGATTGATGTTGGTTGTGTGATGCTTTATGTTCTTGTCTT  
ATTGACCTGTCACCTTTGGCAGCTGATAGGCCTCAaacaacaataacaacaacaacAGTTAGTTCATCACA  
CACTCAGGGGCTAGATAAACTGCGAGTTTATCTATTTTTAGACTAATATTGAATTACTTTTTA  
AGGATTTTCAGTAAATGTCGGTTGTGTACGTTTGTG

>*Aristeus antennatus* voucher LIGUDG Aa872; contig00956; microsatellite Aa956 sequence

ACGCGTTTTCTGTGCTCGTATGTGACAATATGTTTCATGACTGTGTTATTGTTATCTAGCTATTC  
CCCTCCCACACACTATCTAAAACACATATATTCATTCTCTCTCATCTATCATTATCTCTCTC  
CTTAGTCACGTACGGAGAACACTTGCACATAACGCAGGTGTTACagatagataaatagatagatagatCTTT  
ATTGACCACAAATTACAATGTTAAAATACACGTAAAGATATTAGATATATCATAATTCAAT  
TTAAATGATGAGCTAGCTAGACATTTATGGTCCAAATATCACAATGCATGAATTATACAGAG  
TTACCGAAATTATCACAACGAAATCAACACAACATGCGTTAAACCTTAAA

>*Aristeus antennatus* voucher LIGUDG Aa872; contig01061; microsatellite Aa1061 sequence

CCCCTGACGCCAACCCCTCCCATTTACCCGGGCTCGGGACCGGCACTAGGTTGGACTAGATTG  
TCCTCCCCAGTGGCTGGGTGAAagagagagagagAAATTTGTGTCTGTGCATCCATATTACCG  
AGTCGCACATTTTGTGGGTGCGCCCTGGAAGGTAATCCAGACACACATCTCATGTACACATA  
ATTTATTGACTAACTTCAATAATTTGAAAGCTCATGGTCCGATGACCATTAAACACTTCTGT  
TTCTGTTTCTTATTCTGCCTTTATTTCCGCTCGGAATCATTGCTAAAACATTTTTCGTCAAGCT  
AAGGGCGCTCTCAT

>*Aristeus antennatus* voucher LIGUDG Aa872; contig01129; microsatellite Aa1129 sequence

GGGGTATGTTGTATGTCCCAAGTATCAACTCGACTTATGCTACTGTAGAGTCGTGGCCTCAG  
GTGCACCAAGGCTGCCCGTGAACACACTTGTGAGGTGTGAGAGCAGGTTGTCAACCTTGCT  
TCCGGTCTGTGGCTGTGGTGGTTGTTGGAGTGTTCGTATCTCTTGGCTGCTCcatcatcaatc  
catcaatcaatcatCACAAATCGGTGATTTAGTTTGTGGTTGTTGATTTATGGCTATCAACCGTT  
GCACAAGCCATGGTCATTAAGCCAAATCCTATTTATTCTGACTATCACAT

>*Aristeus antennatus* voucher LIGUDG Aa872; contig01169; microsatellite Aa1169 sequence

AATGTACGCTTCCCAACTAAACGCTTATATAAACTTCTCCCTTATTACGCTTTTCTATGAT  
TGGACCCCAGCAGCTCTAACACCAACACATCTACAGCTCCAGCTCCACCAGCGACTTCTTc  
agcagcagcagcAGACGACACCCGAGTTGACCACCCAGGCTGTACATTGTACTTGTACTTTGTA  
CACACTGGGGCAACTGCGGGTGTACTTGAATACAGCTGCAGGAGGCAGAGCTGAT  
CAAAGGCCTAAAATAGGCCAGGACGGAGCACCCTTCAGGTGCATACGC

>*Aristeus antennatus* voucher LIGUDG Aa872; contig01195; microsatellite Aa1195 sequence

CACCGGACATGTCGCGGGCAGACCTTCAGGGACACCGGGTGGAGGGGCAGGGCTGGGGAG  
GGGGAGGAGCAGAGACAGTAGAAGCCAGAACCGGGATGGTTAGATACGGATGagcagcagcagc  
gcagaagcatcggagcagcagcagcagcagtagtagtagtagcagcagcagcaacagcagcagcagcagcagcagc  
GTGG  
GTATTGATCTAAGGTTTGGTCTTAAAGCCGAGGTAACAGCGTGAATAGCTTGGTGGTGGT  
CGGGGGGGGAGGAGAG

>*Aristeus antennatus* voucher LIGUDG Aa872; contig01222; microsatellite Aa1222 sequence

TTAATTTTTATATTACGTTATTCGTTATCTTCCTGCACTAGTTTTTTGTTACGTCATACTGA  
TGCTACTCCGCTTGTTATTCGCTATTTCACTTTCGACTTTTGTTCGTTTCGTTCTTTCTTTCCAC  
CATTTTCTTTCTATTTACCCTCTTcattcatcattcattcttcaCTTTCGACCAAGACTGTGTAACCTCACT  
TTACATCAATATAGCAACTGCCTATAAACTAGCAACATAGGAAGAGCAGACAAATAGTTA  
ATGTCATATATAATGAATG

>*Aristeus antennatus* voucher LIGUDG Aa872; contig01255; microsatellite Aa1255 sequence

TAATTAGGCAGCTGGTGTCTCAGTCTGCTAAGTGTACGTTTGGGTTTCTGATACatataatata  
tatatatatacatatataatGCTCTGGGGGGTGGGGGAGGGAGTCATGGATGACGGGTGGGGTGGGCG  
GTGTATCATGATAAATTCACACCGGCCGAACCAAGATGAGTTAAGAATTTAAAATCTATTT  
CTGAATCCAGTTTGATGTGCTCTTTCAATTTGCAAGATATAAATGGATTGGATCATTTTGAA  
AATTCTG

>*Aristeus antennatus* voucher LIGUDG Aa872; contig01408; microsatellite Aa1408 sequence

CCAGCCATACTCTGTCACCATCGACCTCCGTCTCGCCGCTAAAGTGTCATTTATTTATTTAT  
TTTTTACTTTGTGTCACGGCCCCAGGGAGAGTCGAAAGGGGATGTGACCTTTCGTTTGGTCTC  
GATGCAGGAGAGGGTCGCGAATGACTTCCCGCTCAAAACCTGTCCGtctctctctctcACACACA  
CACACACACACACACACACACACACACACAC

>*Aristeus antennatus* voucher LIGUDG Aa872; contig01444; microsatellite Aa1444 sequence

AATTTGGAGAGTGGTTTGCTCACTTACCTAACTCCACAACTTTACTTTTTAGCCTAAATGA  
GTGAGCTTTGGCTAATGTAGCACAAACatattatatatatatatGAATGATTATATATATCTCTTTCCCTC  
TCTTTCTCACTCTCAACAGTTGTGGTTGTTGTTGGTATGGCTGTGGTGGTGGTGGTGGTGG  
GTGGCGTCTGTAGTGGTAGTGGTGG

>*Aristeus antennatus* voucher LIGUDG Aa872; contig01450; microsatellite Aa1450 sequence

AGCAGTCGGGAAGACGCTTCTTTAATCTTTTAGGAACTTCGTAGTGCCTTCCATCATCAGTG  
AGTGATTAGTTGATTAAAGTTGGCCATTGGAAAAACGATAATTGAATTCCagagagagagagA  
TTTAGTGAAAACCTTATTGACAGTGCAGTTATTACATTAATATGTAAGGGCAGGGTGTCTA  
CATCTGATCCAATAAAGGGTTCTTGGTAGG

>*Aristeus antennatus* voucher LIGUDG Aa872; contig01690; microsatellite Aa1690 sequence

GTACAGAACTATCTACAGTTCGTAAATATAGGACGACACTGTGTGTGGATGAAGGTGAAGA  
CAGTGTGCGTATGAGTGATGGTtgattgattaattgattgaATTTTATAGCCAGAAGTGTACATAAATAC  
TAAAGAATACAGATGTTTCAACTTGGCAGATTAG
